# Supplementary material for: Sarcopenia in patients with chronic kidney disease not yet on dialysis: Analysis of the prevalence and associated factors
Source: PLoS One. 2017 Apr 27;12(4):e0176230. doi: 10.1371/journal.pone.0176230 (PMC5407780; doi:10.1371/journal.pone.0176230)
Supplement: S1 File — (XLS) [file pone.0176230.s001.xls]

## Sheet: Data
Subject	Age	Sex	Ethnicity	Education	CKD	Stage CKD	SAH	DM	Lawton	Walking speed	Handgrip	SBP	DBP	BMI	Functional capacity	Physical Activity	ALMUL	ALMLL	TLM	ALMI/H	ALMI/BMI	Hb	Glucose	Cholest	HDL	LDL	Triglyc	Albumin	Calcium	Phosphor	25(OH)D	PTH	Creatin	ACR	eGFR	hsCRP	IL6	LogIL6	IL4	LogIL4	Proteinuria
1	69	0	0	4	1	3	1	0	8	0.375	34	140	100	32.21	65	1	5.418	15.783	48.681	7.336	0.658	16.23	97	179	37	100	211	4.2	9.2	4.3	23.9	67	1.9	3.33	40.8	5.75	2043.9	7.62	2136.7	7.67	1
2	67	0	0	4	1	1	1	0	8	0.375	34	160	90	25.32	90	1	5.781	15.632	49.034	7.238	0.846	16.71	116	123	40	42	206	4.1	9	3	19.1	43	1.3		65.4	1.7	2147.8	7.67	2454.7	7.81
3	73	1	0	4	1	4	1	1	8	0.375	18	120	80	35.28	35	1	3.713	11.675	34.727	7.219	0.436	13.59	163	275	39	191	226	4.3	10	3.8	17.5	66	2		28	11.29	1893.5	7.55	1413	7.25
4	53	1	0	11	1	3	1	1	8	0.375	22	130	90	29.42	80	1	4.993	14.696	44.375	7.502	0.669	10.02	90	157	50	84	115	4	9.2	4.9	12.9	70	2.1		30.4	14.4	2058.5	7.63	2372.7	7.77
5	69	0	1	6	1	3	1	0	8	0.375	38	120	70	27.07	100	1	6.276	16.465	50.399	8.154	0.84	15.6	125	124	44	60	99	4.4	8.5	3.2	25.8	115	2.2	0.36	34.2	0.62	1461.5	7.29	1382.7	7.23	1
6	78	1	1	0	1	5	1	0	3	1	10	130	80	25.19	65	0	4.483	12.442	39.744	6.955	0.672	10.7	86	118	35	71	61	4	8.6	5	33.3	111	3.7	1.51	12.8	3.33	1392.7	7.24	1431	7.27	1
7	70	1	1	5	1	3	1	1	6	0.5	8	110	60	32.46	55	0	4.602	12.252	36.81	7.907	0.519	13.88	104	221	41	140	199	4.3	8.4	4	15.3	39	1.8	0.1	32.5	1.22	1862.3	7.53	2144.7	7.67	0
8	68	0	1	4	1	1	1	0	8	0.375	26	140	90	23.14	10	1	4.982	14.492	47.164	6.818	0.841	12.5	110	184	49	103	160	4.2	6.9	4.6	29.1	37	1	3.16	89.2	0.99	1805.5	7.5	1994.7	7.6	1
9	59	0	0	11	1	3	1	1	8	0.375	60	170	90	40.28	100	1	8.805	21.71	80.725	9.418	0.758	13.1	94	155	35	84	180	4.3	8.7	4.1	24.4	40	2.3	0.44	34.7	5.56	2143.5	7.67	2164.7	7.68	1
10	74	1	1	4	1	2	1	1	6	0.5	20	140	90	34.21	35	1	5.143	12.844	40.946	7.487	0.526	12.96	97	217	30	151	178	4	7.6	4.2	7.6	91	1.1	0.1	57.3	8.76	1651.6	7.41	2117.3	7.66	0
11	70	0	1	3	1	2	1	1	8	0.375	32	140	90	26.94	70	0	6.157	15.118	48.06	8.415	0.79	14.38	128	140	34	85	105	4.2	7.9	3.6	25.9	51.4	1.6	0.1	49.8	2.25	1806.3	7.5	2003.3	7.6	0
12	56	1	1	13	1	4	1	0	8	0.375	28	160	100	17.57	95	1	3.662	10.427	35.856	5.716	0.802	10.8	74	220	68	135	87	3.7	8.3	3.7	12.8	230	2.6	3.7	23	6.64	1513.6	7.32	2103.3	7.65	1
13	76	0	1	4	1	3	1	1	4	0.75	32	130	80	40.84	60	1	5.005	16.607	41.062	9.232	0.529	13.2	228	133	31	67	173	3.8	9.9	3.5	18.6	79	2.29	0.1	31	6.5	1738	7.46	2535.3	7.84	0
14	84	1	0	0	1	3	1	0	2	1.5	20	140	100	21.1	35	1	4.02	12.306	34.603	6.298	0.774	11.86	102	171	47	106	89	3.8	9.5	6	25.7	55	1.4	0.3	39.9	6.6	1079.9	6.98	1824	7.51	1
15	83	1	1	0	1	3	1	0	1	3	14	130	100	30.47	10	1	4.01	10.802	35.3	7.243	0.486	11.4	89	174	56	99	94	4.1	9.2	3.5	19.8	59	1.4	0.2	40.2	0.05	886.3	6.79	980	6.89	0
16	56	1	1	15	1	4	1	0	8	0.375	18	130	90	25.65	80	1	3.298	11.921	52.892	5.871	0.593	11.95	84	172	33	114	127	4.1	7.4	4.3	15.2	443.9	2.4	0.3	25.3	0.56	677.3	6.52	877.3	6.78	1
17	68	1	1	3	1	3	1	0	2	1.5	22	140	100	26.78	45	1	3.961	11.735	35.51	6.618	0.586	9.02	89	147	43	83	104	3.1	8.7	3.9	11.1	253.8	1.4	0.2	44.6	8.85	666.6	6.5	904	6.81	0
18	74	1	0	2	1	3	1	0	7	0.428571	18	160	100	32.1	55	0	4.455	11.451	50.863	6.976	0.495	12.02	100	209	30	101	392	4.1	8.4	4.3	33.3	139.6	1.5	1	39.4	9.78	1237.1	7.12	804.7	6.69	1
19	68	0	1	4	1	5	1	1	8	0.375	34	140	90	25.91	70	1	6.057	15.69	29.734	7.614	0.839	11.39	107	145	31	79	177	4.2	9.2	4.2	38.2	367.8	4.5	1.2	14.5	5.18	1540.5	7.34	1290	7.16	1
20	67	1	1	4	1	4	1	0	7	0.428571	16	140	70	23.52	55	1	3.203	10.228	49.989	5.055	0.571	5.48	106	137	43	84	50	3.8	8	3.5	28.9	672.2	2.9	0.36	18.6	5.36	1216.6	7.1	1761.3	7.47	1
21	78	0	0	11	1	4	1	0	8	0.375	36	190	90	29.13	55	1	5.386	16.654	53.734	8.295	0.757	13.65	95	157	29	85	213	4	8.6	5.7	24.5	526.2	3.1	2.1	21.2	3.06	1208.1	7.1	1528	7.33	1
22	67	1	1	0	1	4	1	0	7	0.428571	18	150	90	23.6	90	0	2.732	10.408	37.944	5.763	0.557	12.21	93	168	33	119	82	4	8.7	5.4	31.1	147.6	2.1	0.4	27.5	5.15	614.9	6.42	747.3	6.62	1
23	80	0	0	2	1	4	1	0	7	0.428571	36	160	100	27.77	50	1	5.94	15.761	51.152	8.477	0.781	10.7	81	138	44	79	73	4.1	8	4.1	34.2	297.5	4	1.3	15.3	1.54	1116.6	7.02	1695.3	7.44	1
24	68	0	0	4	1	5	1	0	6	0.5	30	120	70	25.99	90	0	7.02	17.292	47.262	8.412	0.936	9.11	92	168	45	99	121	4.3	9.3	4.4	37.3	154.9	5.4	0.8	11.6	0.66	1163.2	7.06	909.3	6.81	1
25	53	1	1	7	1	5	1	0	8	0.375	36	140	90	30.33	100	0	4.557	11.762	63.066	6.706	0.538	10.48	109	195	43	128	122	4.3	10	4.3	43.2	645.4	4.4	0.2	12.4	8.6	1323	7.19	1188.7	7.08	0
26	72	0	1	4	1	4	1	1	4	0.75	24	190	90	31.44	45	1	5.049	16.121	44.651	8.167	0.673	11.9	181	140	43	84	65	4	9.1	4.4	25.4	376.6	2.6	0.4	27.3	6.86	1985.4	7.59	936.7	6.84	1
27	69	0	1	5	1	2	1	1	7	0.428571	36	150	80	30.22	95	1	5.351	14.173	35.701	7.348	0.646	11.18	187	236	33	84	594	3.9	9.8	3.2	26.9	158.3	1.5	0.1	54.3	3.31	1219.6	7.11	992	6.9	0
28	58	0	1	4	1	4	1	1	8	0.375	36	140	100	38.41	55	1	7.368	17.678	31.17	9.544	0.652	15.7	86	187	31	109	233	4.5	9.5	3.9	29.4	205.7	3.3	0.4	22.6	5.47	883.3	6.78	674.7	6.51	1
29	62	0	1	0	1	3	1	0	4	0.75	32	170	90	20.78	65	1	5.234	14.185	29.91	7.309	0.935	12.9	104	124	30	79	73	4	9.7	4.8	32.9	157.3	2	0.1	40.3	2.17	1269.2	7.15	894	6.8	0
30	85	0	1	0	1	2	1	0	6	0.5	34	160	80	28.68	100	1	5.935	15.988	40.992	7.676	0.765	14.2	121	210	50	135	123	4.3	9.8	4.1	22.7	7.36	1.39	0.1	53.2	1.16	1131.2	7.03	793.3	6.68	0
31	73	1	0	3	1	4	1	1	5	0.6	16	180	80	40.36	25	1	3.494	11.812	34.936	6.894	0.379	11.3	127	156	32	78	230	4	9.5	4.6	35.5	331.2	3.18	0.5	16	18.2	1167.5	7.06	1301.3	7.17	1
32	77	1	1	0	1	2	1	1	4	0.75	22	150	80	28.7	85	1	4.488	11.704	52.612	7.008	0.564	13.45	102	224	37	160	135	4.1	8.7	3.6	34	202.4	1.2	0.06	50.5	2	1257.2	7.14	1102.7	7.01	0
33	76	1	0	0	1	5	1	1	7	0.428571	18	170	60	23.38	100	0	3.257	8.832	58.131	5.373	0.517	13.71	239	170	44	101	126	4	9.5	3.6	30.5	105.8	6.24	1.06	7	7	1147.4	7.05	1617.3	7.39	1
34	74	1	1	0	1	1	1	0	8	0.375	20	110	70	19.52	55	1	2.975	8.831	42.692	5.178	0.605	13.04	92	203	31	122	252	4	9.9	4.5	44.5	87.1	1	0.15	64.3	5.8	1298.7	7.17	1056.7	6.96	0
35	87	0	1	0	1	3	1	0	2	1.5	22	110	60	21.71	45	1	4.275	14.526	53.159	5.934	0.866	11.17	119	168	60	86	110	4.4	9.1	2.5	28.6	192	2.1	0.1	31.8	0.05	1182.9	7.08	756.7	6.63	0
36	73	1	1	0	1	3	1	1	4	0.75	10	140	90	26.25	15	1	2.771	11.925	50.458	6.709	0.56	10.77	76	135	44	72	93	3.6	9.4	4.1	23.9	154.4	1.7	0.53	34.1	41.12	1510.2	7.32	531.3	6.28	1
37	70	1	1	0	1	4	1	1	3	1	16	180	70	29.34	10	1	4.005	9.79	50.256	6.05	0.47	10.46	93	183	54	106	116	3.7	9.2	3.6	75.7	180.8	2.6	0.47	20.8	29.27	939.7	6.85	548	6.31	1
38	83	1	1	0	1	1	1	1	5	0.6	18	110	70	25.56	60	1	3.158	7.726	35.692	5.249	0.426	13.4	112	156	41	90	127	4.3	8.6	2.9	37.4	82.6	1	0.06	60.3	7.09	1494.4	7.31	1018	6.93	0
39	61	0	1	11	1	4	1	1	8	0.375	32	150	90	32.41	95	1	5.769	16.992	27.757	8.567	0.702	14.59	137	152	29	67	278	3.5	9.8	2.7	21	286.7	2.78	0.37	27.2	7.13	1167.5	7.06	1616.7	7.39	1
40	65	1	0	4	1	3	1	0	7	0.428571	25	160	100	25.38	35	1	3.046	9.287	35.278	5.481	0.486	12.98	89	189	61	104	120	3.9	9.3	3.5	22.3	291.6	1.6	0.16	38.8	4.91	973.9	6.88	560.7	6.33	0
41	65	0	0	4	1	2	1	1	6	0.5	37	150	70	28.9	40	0	6.519	19.109	34.004	8.465	0.887	14.6	73	150	33	70	233	4.3	9.6	3.5	34.7	140.7	1.6	0.09	51.6	3.31	1114.1	7.02	548.7	6.31	0
42	70	0	1	2	1	4	1	1	6	0.5	32	130	80	22.45	70	1	5.221	14.295	45.359	6.998	0.869	12.8	156	218	37	133	239	4.5	8.6	4.6	46	198.9	3.4	0.29	20	2.31	595.3	6.39	255.3	5.54	1
43	67	0	1	8	1	4	1	1	8	0.375	42	110	70	28.73	95	0	6.644	18.151	34.462	8.785	0.863	12.31	232	96	29	47	98	3.4	9	3.7	35.5	96.8	3.2	0.6	22	10.5	1202.5	7.09	800	6.68	1
44	71	0	1	4	1	4	1	1	8	0.375	46	160	100	28.48	85	1	6.192	16.513	44.681	7.856	0.797	12.28	140	279	29	193	285	4.2	8.9	3.6	32.9	560.2	4.09	1	15.9	1.09	1159.4	7.06	1181	7.07	1
45	82	0	1	3	1	4	1	0	6	0.5	30	140	90	29.36	65	1	6.262	16.865	40.292	8.705	0.788	14.19	122	120	35	58	134	4	8.5	4.8	45.6	154.2	2.8	0.5	23.3	19.39	1544.8	7.34	1644	7.4	1
46	84	1	1	4	1	2	1	0	7	0.428571	16	120	70	34.54	30	1	3.375	11.638	41.368	6.498	0.435	14.31	106	198	37	133	138	4	8.1	5.3	40.3	125	1.2	0.05	48.1	8.71	1269.2	7.15	816.7	6.71	0
47	68	1	1	0	1	3	1	1	5	0.6	36	170	100	36.33	15	1	5.131	16.228	33.659	8.343	0.588	12.17	49	152	35	95	110	3.7	8.9	3.5	34	138.6	1.9	0.3	30.9	25.62	1584.1	7.37	1623	7.39	1
48	95	0	1	2	1	4	1	1	3	1	28	170	100	30.96	35	1	5.283	14.973	52.61	9.503	0.654	12.8	156	173	24	112	186	4.2	8.4	4.3	24.9	171.8	2.1	0.53	21.4	2.94	1355.1	7.21	1378	7.23	1
49	67	1	1	4	1	4	1	1	8	0.375	24	150	100	30.72	90	1	4.157	11.405	34.082	7.01	0.507	11.3	151	121	39	37	227	4.2	9.8	3.1	33.3	52.7	3.1	1.28	17.2	0.49	1385	7.23	1521	7.33	1
50	75	1	1	2	1	3	1	0	7	0.428571	20	170	90	20.68	65	1	2.511	7.932	50.571	4.768	0.505	12.8	90	153	44	87	112	3.8	9.2	3.4	37.4	109.1	1.53	0.34	38.2	0.34	802.5	6.69	714	6.57	1
51	73	0	0	4	1	2	1	1	8	0.375	35	170	100	32.53	45	1	6.511	17.002	33.352	8.742	0.723	13.5	170	230	38	82	551	4.4	8.9	5	11.4	30.2	1.7	0.13	45.4	0.6	1058.1	6.96	1125	7.03	0
52	79	1	1	3	1	2	1	1	7	0.428571	22	150	70	24.33	75	1	3.718	11.51	52.916	6.952	0.626	10.98	104	198	75	108	73	4.1	8.9	3.9	17	36.2	1.28	0.11	46	0.6	888	6.79	915	6.82	0
53	75	0	0	11	1	2	1	1	8	0.375	40	150	70	30.1	60	1	5.411	15.043	42.821	7.794	0.679	15.07	131	149	36	56	283	4.4	9.4	4.4	27.6	167.4	1.5	0.17	52	2.9	1718.7	7.45	1842	7.52	0
54	79	1	1	0	1	1	1	1	8	0.375	28	200	110	24.61	85	0	3.867	10.493	38.085	6.556	0.584	14.39	159	169	48	96	125	4.4	8.8	4.2	23.6	121.2	1	0.19	62.1	0.5	1189.7	7.08	1331.3	7.19	0
55	68	1	1	0	1	4	1	1	8	0.375	38	190	110	31.83	100	1	5.171	14.833	35.976	8.545	0.629	12.25	174	144	36	83	123	3.9	9.5	3.1	21.4	284.9	3.32	0.2	15.7	4.4	946.5	6.85	1095	7	0
56	85	1	0	4	1	3	1	1	3	1	22	160	100	24.25	65	0	3.229	10.095	52.375	5.618	0.55	12.1	206	162	34	74	268	3.9	9.1	4.4	32.6	84.5	1.4	0.4	39.6	5.5	898	6.8	796	6.68	1
57	77	1	1	0	1	2	1	1	6	0.5	26	180	100	47.24	60	1	4.415	14.48	44.629	9.24	0.4	13.23	110	198	57	116	125	4.1	8.3	3.7	28.3	162.6	1.23	0.25	49	1.7	2470	7.81	851	6.75	1
58	81	0	1	4	1	3	1	0	8	0.375	30	140	90	22.43	100	0	5.397	14.112	39.724	7.343	0.87	13.35	102	124	32	74	89	4.2	8.6	2.6	26.3	210.5	1.8	0.8	40	2.4	2191	7.69	813	6.7	1
59	80	1	1	3	1	4	1	1	6	0.5	34	220	130	28.16	50	1	4.139	13.451	35.016	6.871	0.625	11.37	128	168	39	94	176	3.8	9	3.4	25.2	221.3	2.1	0.08	25.1	1.6	714	6.57	1386	7.23	0
60	80	1	1	8	1	5	1	1	6	0.5	27	160	100	25.22	60	1	4.172	14.437	32.849	7.004	0.738	9.96	104	217	65	125	137	4.3	9.6	3.8	26	517.2	4	0.18	11.5	0.5	688	6.53	931	6.84	0
61	70	0	1	3	1	3	1	0	7	0.428571	44	150	90	30.46	25	1	6.795	15.885	40.649	7.941	0.745	13.6	104	134	56	58	102	4.1	8.3	2.3	28	342.1	2.1	0.69	35.9	3					1
62	84	1	1	1	1	3	1	1	1	3	20	100	60	26.82	20	1	3.435	10.562	35.13	5.902	0.522	13	153	176	41	111	118	3.6	9.9	3.9	32.8	219.1	1.73	0.1	30.9	7.5	932	6.84	1197	7.09	0
63	66	1	0	4	1	3	1	1	8	0.375	12	160	80	39.95	45	1	2.664	10.363	42.77	7.043	0.326	11.03	120	77	37	29	57	3.7	9.1	2.7	25.9	525.3	2	0.34	29.4	5.5	1253	7.13	855	6.75	1
64	68	0	1	4	1	4	1	0	5	0.6	36	230	100	24.86	65	1	6.745	18.645	36.754	8.197	1.021	9.84	97	157	70	75	59	4.4	9	3.2	23.7	522.4	4.12	0.48	16.1	1	624	6.44	734	6.6	1
65	66	1	0	4	1	2	1	0	8	0.375	22	140	80	24.93	50	1	3.516	11.361	42.102	6.192	0.597	11.3	104	203	46	126	104	5	8.6	3.8	38.2	70.3	1.38	0.09	46.1	1.9	774	6.65	652	6.48	0
66	75	0	1	4	1	1	1	1	7	0.428571	32	150	80	22.33	100	0	5.773	14.391	37.937	6.896	0.903	11.88	52	287	52	217	88	3.9	9	4	38	90.3	1.1	0.29	75.7	2.3	644	6.47	694	6.54	1
67	90	0	1	4	1	2	1	0	6	0.5	26	150	90	26.56	70	1	4.374	12.587	36.893	6.625	0.639	15.21	82	190	37	131	112	3.8	9.1	3.8	10.5	201.3	1.5	0.07	46.8	5.3	711	6.57	901	6.8	0
68	88	1	1	4	1	5	1	0	5	0.6	16	150	80	24.11	35	1	3.509	10.677	39.707	6.841	0.588	11.44	86	203	55	125	113	3.6	9.2	4.1	34.1	613.2	5.3	2.8	78	1.9	620	6.43	732	6.6	1
69	75	0	0	10	1	2	1	0	6	0.5	36	150	80	25.78	55	1	5.044	13.925	40.7	7.14	0.736	15.78	112	245	38	133	368	4.7	9.3	3.1	28.7	36.5	1.4	0.08	56.6	1.6	794	6.68	620	6.43	0
70	84	1	0	1	1	2	1	1	3	1	14	130	80	32.24	30	0	3	9.876	37.457	6.386	0.399	12.43	235	127	33	67	134	3.4	9.2	12	28.7	262.5	1	0.42	59.9	26.6	996	6.9	810	6.7	1
71	72	0	1	11	1	2	1	1	7	0.428571	40	180	80	27.47	85	0	5.751	16.768	46.867	8.075	0.82	11.63	52	134	51	11	54	3.8	9.7	2.9	39.1	139.7	1.4	0.3	57.8	2.2	1563	7.35	980	6.89	1
72	67	1	1	0	1	3	1	1	4	0.75	30	170	100	29.73	95	1	4.295	10.77	54.961	6.696	0.507	12.2	78	156	34	107	74	3.6	8.5	3.7	35.8	87.9	1.5	0.09	41.4	9.5	1722	7.45	878	6.78	0
73	86	0	0	1	1	3	1	1	7	0.428571	28	150	80	31.98	10	1	6.014	15.779	33.184	8.103	0.682	13.1	124	171	30	114	136	4.2	10.3	3.4	25.8	146.1	1.8	0.19	38.6	7.8	1377	7.23	911	6.81	0
74	72	1	1	4	1	3	1	0	8	0.375	16	140	100	32.79	40	1	4.473	12.768	35.892	6.651	0.526	10.92	88	149	35	90	118	4.3	9.1	3	29.8	123	1.4	0.08	43.4	2	508	6.23	671	6.51	0
75	62	1	1	2	1	4	1	1	6	0.5	26	200	100	28.09	85	1	4.17	12.564	48.631	7.243	0.596	10.3	171	226	44	156	128	3.3	10	3.1	20.5	359	3	4.24	18.5	2.2	672	6.51	653	6.48	1
76	46	1	1	11	1	3	1	0	8	0.375	26	120	70	20.9	35	1	3.79	11.15	41.706	5.488	0.715	13.13	88	247	55	162	149	4.3	9.3	4.8	29.4	342.2	1.9	0.16	36	1.2	2682	7.89	791	6.67	0
77	72	0	1	0	1	4	1	0	7	0.428571	52	160	100	26.64	65	0	7.4	15.776	36.773	8.31	0.87	13.5	100	173	48	102	117	4.7	9.4	4	39.1	104.4	2.48	0.12	28.9	15.3	1858	7.53	443	6.09	0
78	59	0	1	11	1	3	1	0	7	0.428571	38	210	120	25.71	100	0	5.501	14.088	28.179	7.373	0.762	10.4	94	264	56	177	155	4.2	9.5	3.4	32.5	230.7	2.47	1.02	31.9	4.5					1
79	93	1	1	0	1	4	1	0	6	0.5	22	190	100	32.1	35	1	3.533	8.384	29.247	5.668	0.371	11.3	122	230	34	132	321	3.9	9.4	4.2	13.9	657.5	2.55	0.05	18.1	9.1	574	6.35	676	6.52	0
80	68	1	1	1	1	4	1	1	7	0.428571	26	160	100	45.61	45	1	4.795	15.461	46.338	8.884	0.444	11.2	74	149	40	90	97	3.4	9.3	4.4	34	254.2	2.03	0.6	28.5	8.1	643	6.47	715	6.57	1
81	67	1	1	8	1	3	1	1	7	0.428571	16	140	90	38.47	20	1	4.41	11.384	33.157	7.114	0.411	11.64	203	188	44	105	196	3.8	9.1	2.4	31.2	226.3	1.4	0.1	44.9	0.5	699	6.55	533	6.28	0
82	70	1	1	4	1	4	1	1	6	0.5	16	130	70	24	55	1	3.167	8.759	45.005	5.3	0.497	10.53	107	151	35	67	245	3.5	8.4	3.1	13.4	175.7	2.7	1.41	19.9	4.6	1061	6.97	491	6.2
83	73	0	1	3	1	2	1	0	8	0.375	32	150	80	19.55	90	0	4.403	12.887	53.359	6.588	0.885	14.83	96	171	53	83	177	3.8	10	3.5	35.1	225.7	1.5	0.09	52.8	0.9	664	6.5	530	6.27	0
84	68	1	0	6	1	3	1	0	7	0.428571	26	120	80	23.93	90	0	3.753	11.65	47.995	6.093	0.644	12.34	90	134	35	75	119	4.1	9.2	3.7	31.1	147	1.7	0.18	35.3	0.7	1019	6.93	718	6.58	0
85	77	1	1	3	1	2	1	0	8	0.375	28	160	90	29.34	50	1	3.567	11.015	43.439	5.992	0.497	16.11	112	108	54	102	118	4.2	9	3.5	31.1	118.5	1.2	0.15	50.5	1.2	1005	6.91	758	6.63	0
86	81	0	0	4	1	3	1	0	5	0.6	34	140	70	27.07	80	1	5.084	13.082	50.549	7.66	0.671	13.46	83	163	44	101	90	3.9	9	3.7	25.9	212.4	1.66	0.11	44.1	0.5	467	6.15	552	6.31	0
87	78	1	1	3	1	5	1	0	6	0.5	20	140	80	28.22	90	1	3.961	11.401	39.663	7.512	0.544	8.61	91	134	34	65	177	4.3	8.3	3.9	21.6	197.1	3.6	0.04	13.3	0.5	763	6.64	772	6.65	0
88	73	1	1	0	1	3	1	1	7	0.428571	26	190	100	27.01	0	1	3.593	15.377	41.641	8.211	0.702	11.61	348	146	46	69	153	3.8	7.8	3.4	23.6	185.5	1.8	4.03	31.8	4.3	1237	7.12	514	6.24	1
89	89	1	1	0	1	3	1	0	8	0.375	26	180	100	31.5	95	1	4.36	13.231	45.423	7.417	0.558	12.15	91	152	57	77	92	3.9	10.3	3.6	37.6	217.9	1.6	0.12	32.8	2.7	1099	7	763	6.64	0
90	83	1	1	0	1	2	1	1	5	0.6	14	150	70	29.31	100	0	3.655	10.67	34.508	7.104	0.489	11.42	127	204	44	146	121	4	9	3.4	54.4	84	1.1	0.17	53.8	5.3	822	6.71	517	6.25	0
91	83	1	1	4	1	3	1	1	8	0.375	22	180	80	28.43	75	1	2.926	9.292	33.766	5.732	0.43	12.56	107	193	49	117	133	3.9	9	3.4	31.2	179.6	1.5	0.23	37	3.5	849	6.74	904	6.81	1
92	79	1	1	2	1	4	1	1	8	0.375	30	150	90	36.05	10	1	5.33	12.932	53.851	8.009	0.57	11.8	133	124	37	68	96	4	9	3.5	21.3	160.9	2.21	0.5	23.8	4.9	535	6.28	497	6.21	1
93	80	1	0	8	1	3	1	0	6	0.5	18	130	80	34.61	5	1	3.87	14.014	31.398	8.165	0.993	12.92	99	149	41	96	62	3.7	8	4.7	22.9	238.1	1.6	0.43	34.9	2.2	1412	7.25	1101	7	1
94	85	0	0	4	1	3	1	1	5	0.6	34	120	70	29.82	85	1	4.911	13.485	46.663	6.84	0.541	12.41	68	170	40	108	111	3.9	7.9	3.1	39.1	81	1.7	0.41	41.7	5.6	759	6.63	471	6.15	1
95	77	1	1	0	1	2	1	1	8	0.375	18	150	100	35.63	25	0	3.795	12.806	38.992	7.092	0.922	13.19	84	162	64	78	102	3.8	8.7	4.7	36.9	161.7	1.3	0.24	45.8	5.1	708	6.56	1084	6.99	1
96	79	1	1	3	1	3	1	1	7	0.428571	30	180	80	32.89	65	1	4.25	12.978	31.107	7.657	0.524	12.99	65	175	53	108	68	3.4	8.3	4.6	15.6	220.7	1.5	0.34	38	10.5	538	6.29	954	6.86	1
97	87	0	0	4	1	3	1	0	6	0.5	28	180	90	20.23	95	1	4.359	13.06	34.397	6.476	0.861	12.33	101	118	33	72	64	3.7	9.5	3.9	29.3	199.9	2.1	0.32	31.8	3.3	675	6.51	841	6.73	1
98	86	1	0	4	1	3	1	0	6	0.5	22	100	70	27.47	35	1	3.154	9.756	29.596	6.402	0.47	12.25	78	273	41	177	275	4.2	9	3.7	14.3	143.4	1.5	0.19	36.2	0.8	1006	6.91	558	6.32	0
99	66	1	1	8	1	4	1	1	8	0.375	22	190	100	30.98	20	0	4.451	12.004	44.962	7.72	0.531	12.34	133	163	45	81	185	4.1	9.2	4	39.9	309	3	0.32	18	3.9	1809	7.5	732	6.6	1
100	81	0	0	0	1	4	1	1	4	0.75	42	140	100	25.46	100	0	5.399	15.634	31.953	7.028	0.826	11.9	115	201	47	116	188	4.3	9.9	4.1	20.5	211.1	1.9	0.25	28.2	0.6					1

## Sheet: Dictionary
Variable	Meaning
Subject	Subject
Age	Age
Sex	Sex (0: male; 1: female)
Ethnicity	Ethnicity (0: white; 1: non-white)
Education	Education (years of education)
CKD	Chronic kidney disease (0: no; 1: yes)
Stage CKD	Stage of CKD (0: stage 1; 1: stage 2; 2: stage 3A; 3: stage 3B; 4: stage 4; 5: stage 5
SAH	Systemic arterial hypertension (0: no; 1: yes)
DM	Diabetes mellitus (0: no; 1: yes)
Lawton	Activity of daily living
Walking speed	Walking speed (m/s)
Handgrip	Handgrip (kg)
SBP	Systolic blood pressure (mmHg)
DBP	Diastolic blood pressure (mmHg)
BMI	Body mass index (kg/m2)
Functional capacity	Functional capacity SF-36
Physical Activity	Physical Activity (Minesota) (0: active; 1: inactive)
ALMUL	Appendicular lean mass in upper limbs (kg)
ALMLL	Appendicular lean mass in lower limbs (kg)
TLM	Total lean mass (kg)
ALMI/H	Appendicular lean mass index/squared height (kg/h2)
ALMI/BMI	Appendicular lean mass index/body mass index (kg/BMI2)
Hb	Hemoglobin (g%)
Glucose	Glucose (mg/dL)
Cholest	Total cholesterol (mg/dL)
HDL	High density lipoprotein (mg/dL)
LDL	Low density lipoprotein (mg/dL)
Triglyc	Triglycerides (mg/dL)
Albumin	Albumin (g/dL)
Calcium	Calcium (mg/dL)
Phosphor	Phosphorus (mg/dL)
25(OH)D	25-hydroxyvitamin D (ng/dL)
PTH	Parathyroid hormone (pg/ml)
Creatin	Creatinine (mg/dL)
ACR	Albumin/creatinine ratio (mg/g of creatinine)
eGFR	Estimated glomerular filtration rate (ml/min/1.73 m2)
hsCRP	high-sensitivity C-reactive protein (mg/L)
IL6	Interleukin 6 (pg/ml)
LogIL6	Logarithm of Interleukin 6 (pg/ml)
IL4	Interleukin 4 (pg/ml)
LogIL4	Logarithm of Interleukin 4 (pg/ml)
Proteinuria	Proteinuria (0: no; 1: yes)
